# Supplementary material
Source: MDPI journal article supplement (https://www.mdpi.com/search?q=forests-11-00573)
Supplement: s001 [file forests-11-00573-s001.pdf]

**Supplement to**

**Kivimäenpää M, Babalola AB, Joutsensaari J, Holopainen JK. 2020. Methyl Salicylate and Sesquiterpene Emissions are Indicative for Aphid Infestation on Scots Pine. *Forests*.**

Table S1. Emission rates per needle area (ng cm<sup>-2</sup> h<sup>-1</sup>) of BVOCs from control and aphid-infested Scots pine saplings before aphid infestation and at different days after aphid infestation. Values are means (SE) (*n*=6, <sup>†</sup>*n*=5). Emboldened values indicate significant (\**P* < 0.05, \*\* *P* < 0.01, <sup>a</sup>t-test or <sup>b</sup>Mann-Whitney test) difference between the treatments within the sampling day.

|                         | Before                                   |                                          | 7 days                       |                                          | 17 days                                  |                                          | 19 days                                  |                                          | 23 days                                  |                                          | 26 days                                  |                                          | 33 days                                  |                                          | 39 days                                  |                                          |
|-------------------------|------------------------------------------|------------------------------------------|------------------------------|------------------------------------------|------------------------------------------|------------------------------------------|------------------------------------------|------------------------------------------|------------------------------------------|------------------------------------------|------------------------------------------|------------------------------------------|------------------------------------------|------------------------------------------|------------------------------------------|------------------------------------------|
|                         | Control                                  | Aphid                                    | Control                      | Aphid                                    | Control                                  | Aphid                                    | Control                                  | Aphid                                    | Control                                  | Aphid                                    | Control                                  | Aphid <sup>a</sup>                       | Control                                  | Aphid                                    | Control                                  | Aphid                                    |
| <i>Monoterpenes, MT</i> |                                          |                                          |                              |                                          |                                          |                                          |                                          |                                          |                                          |                                          |                                          |                                          |                                          |                                          |                                          |                                          |
| Tricyclene              | 0.02<br>(0.01)                           | 0.02<br>(0.01)                           | 0.04<br>(0.02)               | 0.03<br>(0.01)                           | 0.02<br>(0.01)                           | 0.02<br>( <b>&lt;0.005</b> )             | 0.02<br>(0.01)                           | 0.03<br>(0.02)                           | 0.01<br>( <b>&lt;0.005</b> )             | 0.02<br>(0.01)                           | 0.01<br>(0.01)                           | 0.02<br>( <b>&lt;0.005</b> )             | 0.03<br>(0.01)                           | 0.05<br>(0.02)                           | 0.02<br>(0.01)                           | 0.02<br>( <b>&lt;0.005</b> )             |
| α-Thujene               | 0<br>(0)                                 | 0.01<br>(0.01)                           | 0.01<br>(0.01)               | <b>&lt;0.005</b><br>( <b>&lt;0.005</b> ) | 0<br>(0)                                 | <b>&lt;0.005</b><br>( <b>&lt;0.005</b> ) | 0<br>(0)                                 | <b>&lt;0.005</b><br>( <b>&lt;0.005</b> ) |
| α-Pinene                | 0.94<br>(0.30)                           | 0.97<br>(0.34)                           | 1.46<br>(0.52)               | 1.02<br>(0.28)                           | 0.73<br>(0.31)                           | 1.30<br>(0.70)                           | 0.55<br>(0.19)                           | 1.01<br>(0.35)                           | 0.35<br>(0.11)                           | 0.61<br>(0.21)                           | 0.54<br>(0.25)                           | 0.94<br>(0.11)                           | 0.87<br>(0.32)                           | 1.99<br>(0.70)                           | 0.54<br>(0.24)                           | 0.42<br>(0.10)                           |
| Camphene                | 0.12<br>(0.03)                           | 0.12<br>(0.04)                           | 0.24<br>(0.11)               | 0.16<br>(0.03)                           | 0.12<br>(0.05)                           | 0.12<br>(0.03)                           | 0.10<br>(0.03)                           | 0.19<br>(0.09)                           | 0.09<br>(0.02)                           | 0.14<br>(0.05)                           | 0.10<br>(0.03)                           | 0.15<br>(0.02)                           | 0.15<br>(0.04)                           | 0.32<br>(0.09)                           | 0.09<br>(0.03)                           | 0.06<br>(0.01)                           |
| Sabinene                | 0.01<br>( <b>&lt;0.005</b> )             | 0.06<br>(0.06)                           | 0.12<br>(0.09)               | 0.02<br>(0.01)                           | 0.02<br>(0.01)                           | 0.06<br>(0.04)                           | 0.01<br>(0.01)                           | 0.02<br>(0.01)                           | 0.10<br>(0.09)                           | 0.01<br>( <b>&lt;0.005</b> )             | 0.01<br>( <b>&lt;0.005</b> )             | 0.02<br>(0.01)                           | 0.01<br>(0.01)                           | 0.01<br>( <b>&lt;0.005</b> )             | 0.01<br>( <b>&lt;0.005</b> )             | 0.01<br>( <b>&lt;0.005</b> )             |
| β-Pinene                | 0.04<br>(0.01)                           | 0.11<br>(0.05)                           | 0.30<br>(0.17)               | 0.06<br>(0.01)                           | 0.04<br>(0.01)                           | 0.13<br>(0.10)                           | 0.05<br>(0.01)                           | 0.07<br>(0.02)                           | 0.12<br>(0.10)                           | 0.04<br>(0.01)                           | 0.03<br>(0.01)                           | 0.09<br>(0.03)                           | 0.04<br>(0.01)                           | 0.09<br>(0.03)                           | 0.03<br>(0.01)                           | 0.04<br>(0.01)                           |
| Myrcene                 | 0.07<br>(0.03)                           | 0.29<br>(0.21)                           | 1.25<br>(1.11)               | 0.08<br>(0.03)                           | 0.10<br>(0.02)                           | 1.93<br>(1.89)                           | 0.07<br>(0.02)                           | 0.05<br>(0.02)                           | 0.78<br>(0.68)                           | 0.08<br>(0.06)                           | 0.07<br>(0.04)                           | 0.09<br>(0.03)                           | 0.10<br>(0.04)                           | 0.18<br>(0.07)                           | 0.04<br>(0.01)                           | 0.23<br>(0.19)                           |
| α-Phellandrene          | <b>&lt;0.005</b><br>( <b>&lt;0.005</b> ) | <b>&lt;0.005</b><br>( <b>&lt;0.005</b> ) | 0.03<br>(0.03)               | 0<br>(0)                                 | 0<br>(0)                                 | 0.02<br>(0.02)                           | <b>&lt;0.005</b><br>( <b>&lt;0.005</b> ) | <b>&lt;0.005</b><br>( <b>&lt;0.005</b> ) | 0.01<br>(0.01)                           | 0<br>(0)                                 | 0<br>(0)                                 | <b>&lt;0.005</b><br>( <b>&lt;0.005</b> ) |
| Δ-3-Carene              | 0.19<br>(0.11)                           | 1.48<br>(1.46)                           | 2.15<br>(1.67)               | 0.17<br>(0.11)                           | 0.33<br>(0.21)                           | 0.18<br>(0.16)                           | 0.19<br>(0.10)                           | 0.29<br>(0.27)                           | 1.56<br>(1.48)                           | 0.07<br>(0.04)                           | 0.06<br>(0.03)                           | 0.03<br>(0.02)                           | 0.14<br>(0.06)                           | 0.13<br>(0.11)                           | 0.17<br>(0.14)                           | 0.06<br>(0.04)                           |
| α-Terpinene             | <b>&lt;0.005</b><br>( <b>&lt;0.005</b> ) | 0.001<br>(0.001)                         | 0.026<br>(0.021)             | <b>&lt;0.005</b><br>( <b>&lt;0.005</b> ) | <b>&lt;0.005</b><br>( <b>&lt;0.005</b> ) | 0<br>(0)                                 | <b>&lt;0.005</b><br>( <b>&lt;0.005</b> ) | <b>&lt;0.005</b><br>( <b>&lt;0.005</b> ) | 0.001<br>(0.001)                         | 0<br>(0)                                 | 0<br>(0)                                 | <b>&lt;0.005</b><br>( <b>&lt;0.005</b> ) | <b>&lt;0.005</b><br>( <b>&lt;0.005</b> ) | 0.001<br>( <b>&lt;0.005</b> )            | <b>&lt;0.005</b><br>( <b>&lt;0.005</b> ) | 0<br>(0)                                 |
| p-Cymene                | 0.01<br>( <b>&lt;0.005</b> )             | 0.02<br>(0.01)                           | 0.04<br>(0.03)               | 0.01<br>( <b>&lt;0.005</b> )             | 0.01<br>( <b>&lt;0.005</b> )             | 0.02<br>(0.02)                           | <b>&lt;0.005</b><br>( <b>&lt;0.005</b> ) | 0.01<br>( <b>&lt;0.005</b> )             | 0.09<br>(0.03)                           | 0.06<br>(0.02)                           | 0.01<br>( <b>&lt;0.005</b> )             | 0.02<br>(0.01)                           |
| Limonene                | 0.04<br>(0.01)                           | 0.17<br>(0.11)                           | 0.16<br>(0.09)               | 0.04<br>(0.02)                           | 0.10<br>(0.03)                           | 1.77<br>(1.73)                           | 0.10<br>(0.05)                           | 0.04<br>(0.01)                           | 0.72<br>(0.58)                           | 0.04<br>(0.01)                           | 0.11<br>(0.07)                           | 0.09<br>(0.04)                           | 0.16<br>(0.09)                           | 0.16<br>(0.07)                           | 0.03<br>(0.01)                           | 0.08<br>(0.07)                           |
| β-Phellandrene          | 0.08<br>(0.07)                           | 0.25<br>(0.17)                           | 1.53<br>(1.50)               | 0.01<br>( <b>&lt;0.005</b> )             | 0.03<br>(0.01)                           | 0.82<br>(0.81)                           | 0.02<br>(0.01)                           | 0.01<br>( <b>&lt;0.005</b> )             | 0.37<br>(0.31)                           | 0.02<br>(0.01)                           | 0.02<br>(0.01)                           | 0.06<br>(0.02)                           | 0.03<br>(0.01)                           | 0.06<br>(0.03)                           | 0.01<br>(0.01)                           | 0.08<br>(0.05)                           |
| 1,8-Cineole             | 0.01<br>( <b>&lt;0.005</b> )             | 0.01<br>( <b>&lt;0.005</b> )             | 0.02<br>( <b>&lt;0.005</b> ) | 0.02<br>( <b>&lt;0.005</b> )             | 0.01<br>( <b>&lt;0.005</b> )             | 0.02<br>(0.01)                           | 0.01<br>( <b>&lt;0.005</b> )             | 0.03<br>(0.01)                           | 0.02<br>( <b>&lt;0.005</b> )             | 0.02<br>(0.01)                           | 0.02<br>(0.01)                           | 0.03<br>(0.01)                           | 0.02<br>(0.01)                           | 0.04<br>(0.01)                           | 0.01<br>( <b>&lt;0.005</b> )             | 0.01<br>( <b>&lt;0.005</b> )             |
| ( <i>E</i> )-β-Ocimene  | <b>&lt;0.005</b><br>( <b>&lt;0.005</b> ) | <b>&lt;0.005</b><br>( <b>&lt;0.005</b> ) | 0.01<br>( <b>&lt;0.005</b> ) | 0.01<br>( <b>&lt;0.005</b> )             | 0.01<br>(0.01)                           | 0.03<br>(0.02)                           | 0.01<br>( <b>&lt;0.005</b> )             | 0.02<br>(0.01)                           | 0.01<br>( <b>&lt;0.005</b> )             | 0.01<br>( <b>&lt;0.005</b> )             | 0.01<br>(0.01)                           | 0.02<br>(0.01)                           | 0.02<br>(0.01)                           | 0.03<br>(0.01)                           | 0.02<br>(0.01)                           | 0.02<br>(0.01)                           |
| γ-Terpinene             | <b>&lt;0.005</b><br>( <b>&lt;0.005</b> ) | 0.02<br>(0.01)                           | 0.03<br>(0.02)               | <b>&lt;0.005</b><br>( <b>&lt;0.005</b> ) | <b>&lt;0.005</b><br>( <b>&lt;0.005</b> ) | 0.01<br>( <b>&lt;0.005</b> )             | <b>&lt;0.005</b><br>( <b>&lt;0.005</b> ) | <b>&lt;0.005</b><br>( <b>&lt;0.005</b> ) | 0.02<br>(0.01)                           | <b>&lt;0.005</b><br>( <b>&lt;0.005</b> ) | 0.01<br>( <b>&lt;0.005</b> )             | 0.01<br>( <b>&lt;0.005</b> )             | <b>&lt;0.005</b><br>( <b>&lt;0.005</b> ) | 0.01<br>( <b>&lt;0.005</b> )             | 0.01<br>( <b>&lt;0.005</b> )             | <b>&lt;0.005</b><br>( <b>&lt;0.005</b> ) |
| Terpinolene             | 0.01<br>(0.01)                           | 0.08<br>(0.08)                           | 0.13<br>(0.12)               | 0.01<br>(0.01)                           | 0.01<br>(0.01)                           | 0.02<br>(0.01)                           | <b>&lt;0.005</b><br>( <b>&lt;0.005</b> ) | 0.02<br>(0.11)                           | 0.11<br>(0.11)                           | <b>&lt;0.005</b><br>( <b>&lt;0.005</b> ) | <b>&lt;0.005</b><br>( <b>&lt;0.005</b> ) | <b>&lt;0.005</b><br>( <b>&lt;0.005</b> ) | 0.01<br>( <b>&lt;0.005</b> )             | 0.01<br>(0.01)                           | 0.01<br>(0.01)                           | <b>&lt;0.005</b><br>( <b>&lt;0.005</b> ) |

Table S1 Continued. Emission rates per needle area (ng cm<sup>-2</sup> h<sup>-1</sup>) of BVOCs from control and aphid-infested Scots pine saplings before aphid infestation and at different days after aphid infestation. Values are means (SE) (*n*=6, <sup>†</sup>*n*=5). Emboldened values indicate significant (\**P* < 0.05, \*\* *P* < 0.01, <sup>a</sup>t-test or <sup>b</sup>Mann-Whitney test) difference between the treatments within the sampling day.

|                             | Before             |                    | 7 days             |                    | 17 days            |                    | 19 days            |                    | 23 days            |                    | 26 days            |                               | 33 days            |                               | 39 days            |                    |
|-----------------------------|--------------------|--------------------|--------------------|--------------------|--------------------|--------------------|--------------------|--------------------|--------------------|--------------------|--------------------|-------------------------------|--------------------|-------------------------------|--------------------|--------------------|
|                             | Control            | Aphid              | Control            | Aphid <sup>†</sup>            | Control            | Aphid                         | Control            | Aphid              |
| <i>Monoterpenes (cont.)</i> |                    |                    |                    |                    |                    |                    |                    |                    |                    |                    |                    |                               |                    |                               |                    |                    |
| Linalool                    | 0<br>(0)           | 0<br>(0)           | <0.005<br>(<0.005) | 0<br>(0)           | 0<br>(0)           | 0<br>(0)           | 0<br>(0)           | 0<br>(0)           | <0.005<br>(<0.005) | 0<br>(0)           | <0.005<br>(<0.005) | 0<br>(0)                      | <0.005<br>(<0.005) | 0<br>(0)                      | 0<br>(0)           | <0.005<br>(<0.005) |
| Camphor                     | <0.005<br>(<0.005) | 0.01<br>(<0.005)   | 0.01<br>(<0.005)   | 0.01<br>(<0.005)   | 0.01<br>(<0.005)   | 0.02<br>(<0.005)   | 0.01<br>(<0.005)   | 0.02<br>(<0.005)   | 0.01<br>(<0.005)   | <0.005<br>(<0.005) | 0.01<br>(<0.005)   | 0.02<br>(0.01)                | <0.005<br>(<0.005) | <sup>a</sup> 0.02*<br>(0.01)  | <0.005<br>(<0.005) | <0.005<br>(<0.005) |
| Borneol                     | 0<br>(0)           | <0.005<br>(<0.005) | <0.005<br>(<0.005) | <0.005<br>(<0.005) | <0.005<br>(<0.005) | 0.01<br>(<0.005)   | <0.005<br>(<0.005) | 0.01<br>(<0.005)   | <0.005<br>(<0.005) | <0.005<br>(<0.005) | <0.005<br>(<0.005) | 0.02<br>(0.02)                | <0.005<br>(<0.005) | <sup>b</sup> 0.02*<br>(0.01)  | <0.005<br>(<0.005) | <0.005<br>(<0.005) |
| Terpinen-4-ol               | 0<br>(0)           | <0.005<br>(<0.005) | 0<br>(0)           | 0<br>(0)           | 0<br>(0)           | 0<br>(0)           | 0<br>(0)           | 0<br>(0)           | <0.005<br>(<0.005) | 0<br>(0)           | <0.005<br>(<0.005) | <0.005<br>(<0.005)            | 0<br>(0)           | <0.005<br>(<0.005)            | 0<br>(0)           | 0<br>(0)           |
| α-Terpineol                 | 0<br>(0)           | 0<br>(0)           | <0.005<br>(<0.005) | <0.005<br>(<0.005) | 0<br>(0)           | <0.005<br>(<0.005) | 0<br>(0)           | <0.005<br>(<0.005) | 0<br>(0)           | <0.005<br>(<0.005) | 0<br>(0)           | <0.005<br>(<0.005)            | 0<br>(0)           | <0.005<br>(<0.005)            | 0<br>(0)           | 0<br>(0)           |
| Bornylacetate               | 0.01<br>(<0.005)   | 0.02<br>(0.01)     | 0.02<br>(0.02)     | 0.02<br>(0.01)     | 0.01<br>(<0.005)   | 0.01<br>(<0.005)   | 0.02<br>(0.01)     | 0.02<br>(0.02)     | 0.01<br>(<0.005)   | 0.02<br>(0.01)     | 0.01<br>(<0.005)   | 0.01<br>(<0.005)              | 0.01<br>(<0.005)   | 0.05<br>(0.02)                | <0.005<br>(<0.005) | <0.005<br>(<0.005) |
| <i>Sesquiterpenes, SQT</i>  |                    |                    |                    |                    |                    |                    |                    |                    |                    |                    |                    |                               |                    |                               |                    |                    |
| α-Copaene                   | <0.005<br>(<0.005) | <0.005<br>(<0.005) | <0.005<br>(<0.005) | <0.005<br>(<0.005) | 0<br>(0)           | 0<br>(0)           | <0.005<br>(<0.005) | 0.01<br>(0.01)     | <0.005<br>(<0.005) | 0<br>(0)           | <0.005<br>(<0.005) | 0<br>(0)                      | 0<br>(0)           | 0.01<br>(0.01)                | 0<br>(0)           | <0.005<br>(<0.005) |
| β-Elemene                   | <0.005<br>(<0.005) | 0.01<br>(<0.005)   | <0.005<br>(<0.005) | <0.005<br>(<0.005) | <0.005<br>(<0.005) | <0.005<br>(<0.005) | <0.005<br>(<0.005) | 0.01<br>(<0.005)   | <0.005<br>(<0.005) | <0.005<br>(<0.005) | <0.005<br>(<0.005) | <0.005<br>(<0.005)            | <0.005<br>(<0.005) | <sup>b</sup> 0.01*<br>(0.01)  | <0.005<br>(<0.005) | <0.005<br>(<0.005) |
| Longifolene                 | <0.005<br>(<0.005) | <0.005<br>(<0.005) | <0.005<br>(<0.005) | 0<br>(0)           | <0.005<br>(<0.005) | 0<br>(0)           | <0.005<br>(<0.005) | <0.005<br>(<0.005) | <0.005<br>(<0.005) | 0<br>(0)           | <0.005<br>(<0.005) | <0.005<br>(<0.005)            | <0.005<br>(<0.005) | <0.005<br>(<0.005)            | 0<br>(0)           | 0<br>(0)           |
| β-caryophyllene             | 0.01<br>(<0.005)   | 0.01<br>(0.01)     | 0.02<br>(0.01)     | 0.01<br>(0.01)     | <0.005<br>(<0.005) | <0.005<br>(<0.005) | 0.01<br>(0.01)     | 0.02<br>(0.02)     | <0.005<br>(<0.005) | 0.01<br>(0.01)     | 0.01<br>(<0.005)   | 0.01<br>(<0.005)              | <0.005<br>(<0.005) | <sup>b</sup> 0.04*<br>(0.02)  | 0.01<br>(0.01)     | 0.01<br>(0.01)     |
| ( <i>E</i> )-β-Farnesene    | 0<br>(0)           | <0.005<br>(<0.005) | <0.005<br>(<0.005) | <0.005<br>(<0.005) | <0.005<br>(<0.005) | 0.01<br>(0.01)     | 0.01<br>(<0.005)   | 0.04<br>(0.03)     | 0.01<br>(<0.005)   | 0.07<br>(0.06)     | 0.01<br>(<0.005)   | 0.10<br>(0.06)                | <0.005<br>(<0.005) | 0.10<br>(0.07)                | <0.005<br>(<0.005) | 0.01<br>(0.01)     |
| Aromadendrene               | <0.005<br>(<0.005) | <0.005<br>(<0.005) | 0.01<br>(0.01)     | <0.005<br>(<0.005) | 0<br>(0)           | <0.005<br>(<0.005) | 0.01<br>(0.01)     | 0.03<br>(0.02)     | <0.005<br>(<0.005) | 0.01<br>(<0.005)   | 0.01<br>(<0.005)   | <0.005<br>(<0.005)            | <0.005<br>(<0.005) | 0.02<br>(0.01)                | 0<br>(0)           | <0.005<br>(<0.005) |
| α-Humulene                  | <0.005<br>(<0.005) | 0<br>(0)           | <0.005<br>(<0.005) | <0.005<br>(<0.005) | <0.005<br>(<0.005)            | <0.005<br>(<0.005) | <0.005<br>(<0.005)            | <0.005<br>(<0.005) | <0.005<br>(<0.005) |
| ( <i>E, E</i> )-α-Farnesene | 0<br>(0)           | 0.01<br>(0.01)     | <0.005<br>(<0.005) | 0.04<br>(0.02)     | 0.01<br>(0.01)     | 0.01<br>(<0.005)   | <0.005<br>(<0.005) | 0.39<br>(0.37)     | <0.005<br>(<0.005) | 0.75<br>(0.69)     | 0.01<br>(0.01)     | <sup>b</sup> 0.70**<br>(0.44) | 0.01<br>(0.01)     | <sup>b</sup> 0.64**<br>(0.43) | 0.01<br>(0.01)     | 0.16<br>(0.08)     |
| α-Amorphene                 | <0.005<br>(<0.005) | 0.01<br>(<0.005)   | 0.01<br>(0.01)     | 0.01<br>(0.01)     | <0.005<br>(<0.005) | <0.005<br>(<0.005) | 0.01<br>(0.01)     | 0.02<br>(0.02)     | <0.005<br>(<0.005) | 0.01<br>(0.01)     | <0.005<br>(<0.005) | 0.01<br>(<0.005)              | <0.005<br>(<0.005) | <sup>b</sup> 0.05*<br>(0.02)  | <0.005<br>(<0.005) | 0.02<br>(0.01)     |
| α-Muurolene                 | <0.005<br>(<0.005) | 0.01<br>(<0.005)   | 0.01<br>(<0.005)   | 0.01<br>(0.01)     | 0<br>(0)           | 0<br>(0)           | 0.02<br>(0.01)     | 0.03<br>(0.02)     | 0.01<br>(<0.005)   | 0.02<br>(0.01)     | 0.01<br>(<0.005)   | 0.02<br>(0.01)                | <0.005<br>(<0.005) | <sup>a</sup> 0.05*<br>(0.02)  | <0.005<br>(<0.005) | 0.03<br>(0.01)     |

Table S1 Continued. Emission rates per needle area (ng cm<sup>-2</sup> h<sup>-1</sup>) of BVOCs from control and aphid-infested Scots pine saplings before aphid infestation and at different days after aphid infestation. Values are means (SE) (n=6, \*n=5). Emboldened values indicate significant (\*P < 0.05, \*\* P < 0.01, <sup>a</sup>t-test or <sup>b</sup>Mann-Whitney test) difference between the treatments within the sampling day.

|                                  | Before   |          | 7 days   |                           | 17 days  |                           | 19 days  |                           | 23 days  |                           | 26 days  |                          | 33 days  |                           | 39 days                   |                           |
|----------------------------------|----------|----------|----------|---------------------------|----------|---------------------------|----------|---------------------------|----------|---------------------------|----------|--------------------------|----------|---------------------------|---------------------------|---------------------------|
|                                  | Control  | Aphid    | Control  | Aphid                     | Control  | Aphid                     | Control  | Aphid                     | Control  | Aphid                     | Control  | Aphid <sup>a</sup>       | Control  | Aphid                     | Control                   | Aphid                     |
| <i>Sesquiterpenes (cont.)</i>    |          |          |          |                           |          |                           |          |                           |          |                           |          |                          |          |                           |                           |                           |
| δ-                               | 0.01     | 0.05     | 0.02     | 0.03                      | <0.005   | <0.005                    | 0.04     | 0.05                      | <0.005   | 0.02                      | 0.02     | 0.02                     | 0.01     | <b><sup>b</sup>0.09*</b>  | 0.01                      | 0.03                      |
| Cadinene                         | (<0.005) | (0.03)   | (0.01)   | (0.02)                    | (<0.005) | (<0.005)                  | (0.03)   | (0.04)                    | (<0.005) | (0.01)                    | (0.01)   | (<0.005)                 | (<0.005) | <b>(0.04)</b>             | (0.01)                    | (0.01)                    |
| Cis-α-                           | 0        | 0        | 0        | 0                         | 0        | 0                         | 0        | 0                         | 0        | <0.005                    | <0.005   | <0.005                   | 0        | <b><sup>b</sup>0.01*</b>  | <0.005                    | 0.01                      |
| Bisabolene                       | (0)      | (0)      | (0)      | (0)                       | (0)      | (0)                       | (0)      | (0)                       | (0)      | (<0.005)                  | (<0.005) | (<0.005)                 | (0)      | <b>(0.01)</b>             | (<0.005)                  | (0.01)                    |
| <i>Green leaf volatiles, GLV</i> |          |          |          |                           |          |                           |          |                           |          |                           |          |                          |          |                           |                           |                           |
| (E)-2-                           | 0        | 0        | 0        | 0                         | 0        | 0                         | 0        | 0                         | 0.01     | 0                         | <0.005   | 0                        | 0        | 0.02                      | 0                         | 0                         |
| Hexenal                          | (0)      | (0)      | (0)      | (0)                       | (0)      | (0)                       | (0)      | (0)                       | (0.01)   | (0)                       | (<0.005) | (0)                      | (0)      | (0.02)                    | (0)                       | (0)                       |
| (Z)-3-                           | 0        | 0        | <0.005   | 0                         | 0        | 0                         | 0        | <0.005                    | 0.04     | <0.005                    | 0.02     | <0.005                   | <0.005   | 0.11                      | 0                         | 0                         |
| Hexen-1-                         | (0)      | (0)      | (<0.005) | (0)                       | (0)      | (0)                       | (0)      | (<0.005)                  | (0.04)   | (<0.005)                  | (0.02)   | (<0.005)                 | (<0.005) | (0.11)                    | (0)                       | (0)                       |
| ol                               |          |          |          |                           |          |                           |          |                           |          |                           |          |                          |          |                           |                           |                           |
| 1-Hexanol                        | <0.005   | <0.005   | <0.005   | <0.005                    | 0        | 0                         | <0.005   | <0.005                    | <0.005   | <0.005                    | <0.005   | <0.005                   | <0.005   | <0.005                    | <b><sup>b</sup>0.01**</b> | 0.00±0.00                 |
|                                  | (<0.005) | (<0.005) | (<0.005) | (<0.005)                  | (0)      | (0)                       | (<0.005) | (<0.005)                  | (<0.005) | (<0.005)                  | (<0.005) | (<0.005)                 | (<0.005) | (<0.005)                  | <b>(&lt;0.005)</b>        | 0.00±0.00                 |
| (Z)-3-                           | <0.005   | 0.01     | 0.01     | <0.005                    | <0.005   | <0.005                    | <0.005   | <b><sup>b</sup>0.01*</b>  | 0.01     | <0.005                    | 0.04     | <0.005                   | <0.005   | 0.26                      | <0.005                    | <0.005                    |
| Hexenyl                          | (<0.005) | (0.01)   | (0.01)   | (<0.005)                  | (<0.005) | (<0.005)                  | (<0.005) | <b>(&lt;0.005)</b>        | (0.01)   | (<0.005)                  | (0.03)   | (<0.005)                 | (<0.005) | (0.25)                    | (<0.005)                  | (<0.005)                  |
| acetate                          |          |          |          |                           |          |                           |          |                           |          |                           |          |                          |          |                           |                           |                           |
| <i>Benzenoids</i>                |          |          |          |                           |          |                           |          |                           |          |                           |          |                          |          |                           |                           |                           |
| Methyl                           | 0        | <0.005   | <0.005   | <b><sup>b</sup>0.02**</b> | <0.005   | <b><sup>b</sup>0.82**</b> | <0.005   | <b><sup>b</sup>1.00**</b> | <0.005   | <b><sup>b</sup>0.89**</b> | <0.005   | <b><sup>a</sup>1.83*</b> | <0.005   | <b><sup>a</sup>2.65**</b> | <0.005                    | <b><sup>b</sup>1.23**</b> |
| salicylate                       | (0)      | (<0.005) | (<0.005) | <b>(0.01)</b>             | (<0.005) | <b>(0.36)</b>             | (<0.005) | <b>(0.53)</b>             | (<0.005) | <b>(0.39)</b>             | (<0.005) | <b>(0.59)</b>            | (<0.005) | <b>(0.98)</b>             | (<0.005)                  | <b>(0.70)</b>             |
| <i>Total emissions</i>           |          |          |          |                           |          |                           |          |                           |          |                           |          |                          |          |                           |                           |                           |
| MTs                              | 1.57     | 3.67     | 7.59     | 1.66                      | 1.56     | 6.50                      | 1.17     | 1.85                      | 4.38     | 1.18                      | 1.02     | 1.59                     | 1.60     | 3.25                      | 1.02                      | 1.09                      |
|                                  | (0.31)   | (2.00)   | (5.10)   | (0.37)                    | (0.60)   | (5.35)                    | (0.36)   | (0.83)                    | (3.50)   | (0.39)                    | (0.35)   | (0.17)                   | (0.38)   | (0.92)                    | (0.44)                    | (0.31)                    |
| SQTs                             | 0.03     | 0.12     | 0.09     | 0.14                      | 0.03     | 0.16                      | 0.13     | 0.63                      | 0.05     | 0.90                      | 0.10     | 0.87                     | 0.05     | <b><sup>a</sup>1.08*</b>  | 0.06                      | 0.29                      |
|                                  | (0.02)   | (0.06)   | (0.04)   | (0.06)                    | (0.02)   | (0.11)                    | (0.09)   | (0.43)                    | (0.02)   | (0.80)                    | (0.05)   | (0.52)                   | (0.01)   | <b>(0.56)</b>             | (0.03)                    | (0.14)                    |
| GLVs                             | <0.005   | 0.01     | 0.01     | 0.01                      | <0.005   | <0.005                    | <0.005   | <b><sup>b</sup>0.01*</b>  | 0.01     | 0.01                      | 0.06     | 0.01                     | 0.01     | 0.41                      | <0.005                    | <0.005                    |
|                                  | (<0.005) | (<0.005) | (0.01)   | (<0.005)                  | (<0.005) | (<0.005)                  | (<0.005) | <b>(0.01)</b>             | (0.01)   | (<0.005)                  | (0.06)   | (<0.005)                 | (<0.005) | (0.39)                    | (<0.005)                  | (<0.005)                  |

<sup>a</sup>n=5. A few plant individuals emitted MTs α-fenchene and verbenene, SQTs β-cubebene, and 6 unidentified SQTs, and GLV cis-3-hexenyl-isovalerate. These compounds were not affected by aphid-infestation and are included in total MTs, SQTs and GLVs, respectively. Compounds for each group are shown in order of increasing retention t

Table S2. Average (SE) ( $n=6$ ) of systemic BVOC emission rates ( $\text{ng cm}^{-2} \text{h}^{-1}$ ) collected from an uninfested branch adjacent to an aphid-infested Scots pine branches and from control trees 39 days after aphid-infestation (Experiment 1). Compounds for each group are shown in order of increasing retention times. Differences between the treatments were not significant.

| Compound                             | Control         | Aphid-infested  |
|--------------------------------------|-----------------|-----------------|
| <u>Monoterpenes, MT</u>              |                 |                 |
| Tricyclene                           | 0.03 (0.01)     | 0.25 (0.20)     |
| $\alpha$ -Thujene                    | <0.005 (<0.005) | 0.05 (0.05)     |
| $\alpha$ -Pinene                     | 0.34 (0.07)     | 2.32 (1.69)     |
| Camphene                             | 0.08 (0.01)     | 1.13 (0.99)     |
| Sabinene                             | 0.04 (0.02)     | 0.10 (0.09)     |
| $\beta$ -Pinene                      | 0.12 (0.09)     | 0.52 (0.48)     |
| $\alpha$ -Phellandrene               | 0.01 (0.01)     | 0.04 (0.03)     |
| Myrcene                              | 0.68 (0.56)     | 3.17 (3.06)     |
| $\Delta$ -3-carene                   | 0.13 (0.08)     | 0.03 (0.02)     |
| $\alpha$ -Terpinene                  | 0.02 (0.01)     | 0.06 (0.05)     |
| p-cymene                             | 0.09 (0.02)     | 0.67 (0.59)     |
| Limonene                             | 2.27 (1.93)     | 0.27 (0.22)     |
| $\beta$ -Phellanderene               | 0.51 (0.42)     | 1.17 (1.12)     |
| 1,8-cineole                          | 0.02 (<0.005)   | 0.03 (0.01)     |
| ( <i>E</i> )- $\beta$ -Ocimene       | 0.03 (0.01)     | 0.15 (0.11)     |
| $\gamma$ -Terpinene                  | 0.01 (<0.005)   | 0.04 (0.04)     |
| Terpinolene                          | 0.01 (0.01)     | 0.09 (0.09)     |
| Camphor                              | 0.01 (<0.005)   | 0.02 (0.01)     |
| Borneol                              | <0.005 (<0.005) | 0.01 (0.01)     |
| Bornylacetate                        | 0.01 (<0.005)   | 0.14 (0.12)     |
| <u>Sesquiterpenes, SQT</u>           |                 |                 |
| $\alpha$ -Copaene                    | <0.005 (<0.005) | 0.02 (0.02)     |
| $\beta$ -Elemene                     | <0.005 (<0.005) | 0.04 (0.04)     |
| Longifolene                          | <0.005 (<0.005) | <0.005 (<0.005) |
| $\beta$ -Caryophyllene               | <0.005 (<0.005) | 0.12 (0.10)     |
| ( <i>E</i> )- $\beta$ -Farnesene     | 0.01 (<0.005)   | 0.02 (0.02)     |
| Aromadendrene                        | <0.005 (<0.005) | 0.03 (0.03)     |
| $\alpha$ -Humulene                   | <0.005 (<0.005) | 0.02 (0.01)     |
| unknown ST                           | 0.03 (0.02)     | 0.04 (0.04)     |
| ( <i>E, E</i> )- $\alpha$ -Farnesene | 0.05 (0.03)     | 0.31 (0.25)     |
| $\alpha$ -Amorphene                  | 0.02 (0.01)     | 0.07 (0.05)     |
| $\alpha$ -Muurolene                  | 0.07 (0.03)     | 0.11 (0.05)     |
| $\delta$ -Cadinene                   | 0.05 (0.02)     | 0.16 (0.10)     |
| Cis- $\alpha$ -Bisabolene            | 0 (0)           | <0.005 (<0.005) |
| <u>Green leaf volatiles, GLV</u>     |                 |                 |
| ( <i>E</i> )-2-Hexenal               | 0 (0)           | <0.005 (<0.005) |
| ( <i>Z</i> )-3-Hexen-1-ol            | 0 (0)           | 0.01 (0.01)     |
| 1-Hexanol                            | 0 (0)           | <0.005 (<0.005) |
| ( <i>Z</i> )-3-Hexenyl acetate       | 0.01 (0.01)     | 0.04 (0.04)     |
| <u>Benzenoids</u>                    |                 |                 |
| Methyl salicylate                    | <0.005 (<0.005) | 0.01 (0.01)     |
| <u>Total emissions</u>               |                 |                 |
| MTs                                  | 4.44 (3.09)     | 10.36 (8.62)    |
| SQTs                                 | 0.28(0.09)      | 1.04(0.72)      |
| GLVs                                 | 0.01 (0.01)     | 0.05 (0.05)     |
